# Supplementary material for: Real-time tracking of the entangled pathways in the multichannel photodissociation of acetaldehyde
Source: Royal Society of Chemistry journal article supplement (doi:10.1039/d0sc00063a), 2020-01-01
Supplement: d0sc00063a2.pdf [file d0sc00063a2.pdf]

# Real-Time Tracking of Entangled Pathways in the Photodissociation of Acetaldehyde

Photodissociation of acetaldehyde occurs via different pathways, including the “roaming” mechanism

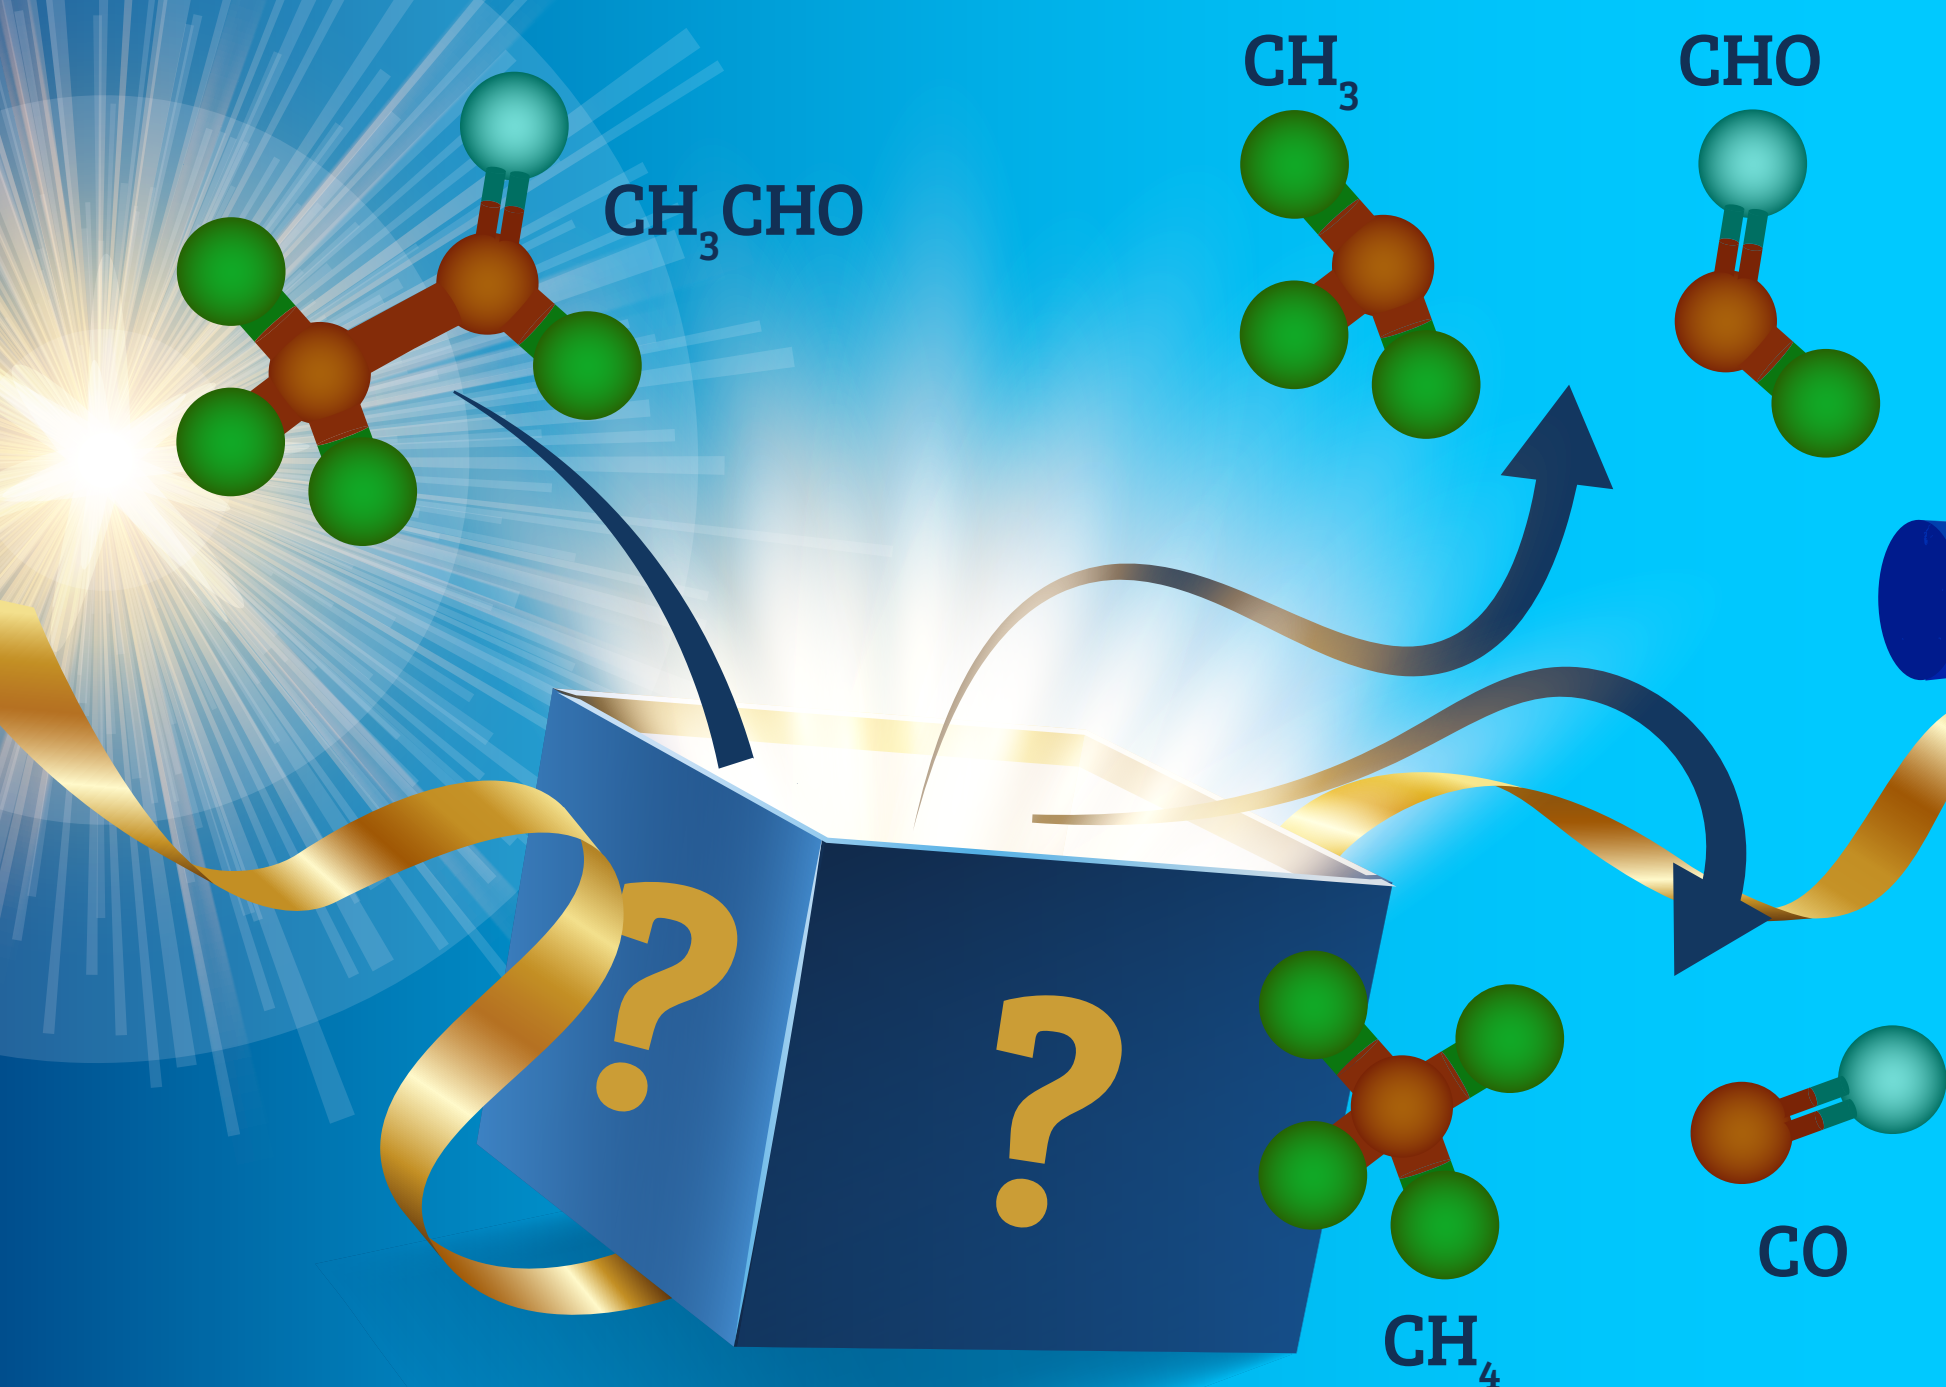

However, the details of these mechanisms are not always clear

Can we study the different reaction pathways by tracking the time evolution of product distributions?

Joint experimental and theoretical study of the reaction

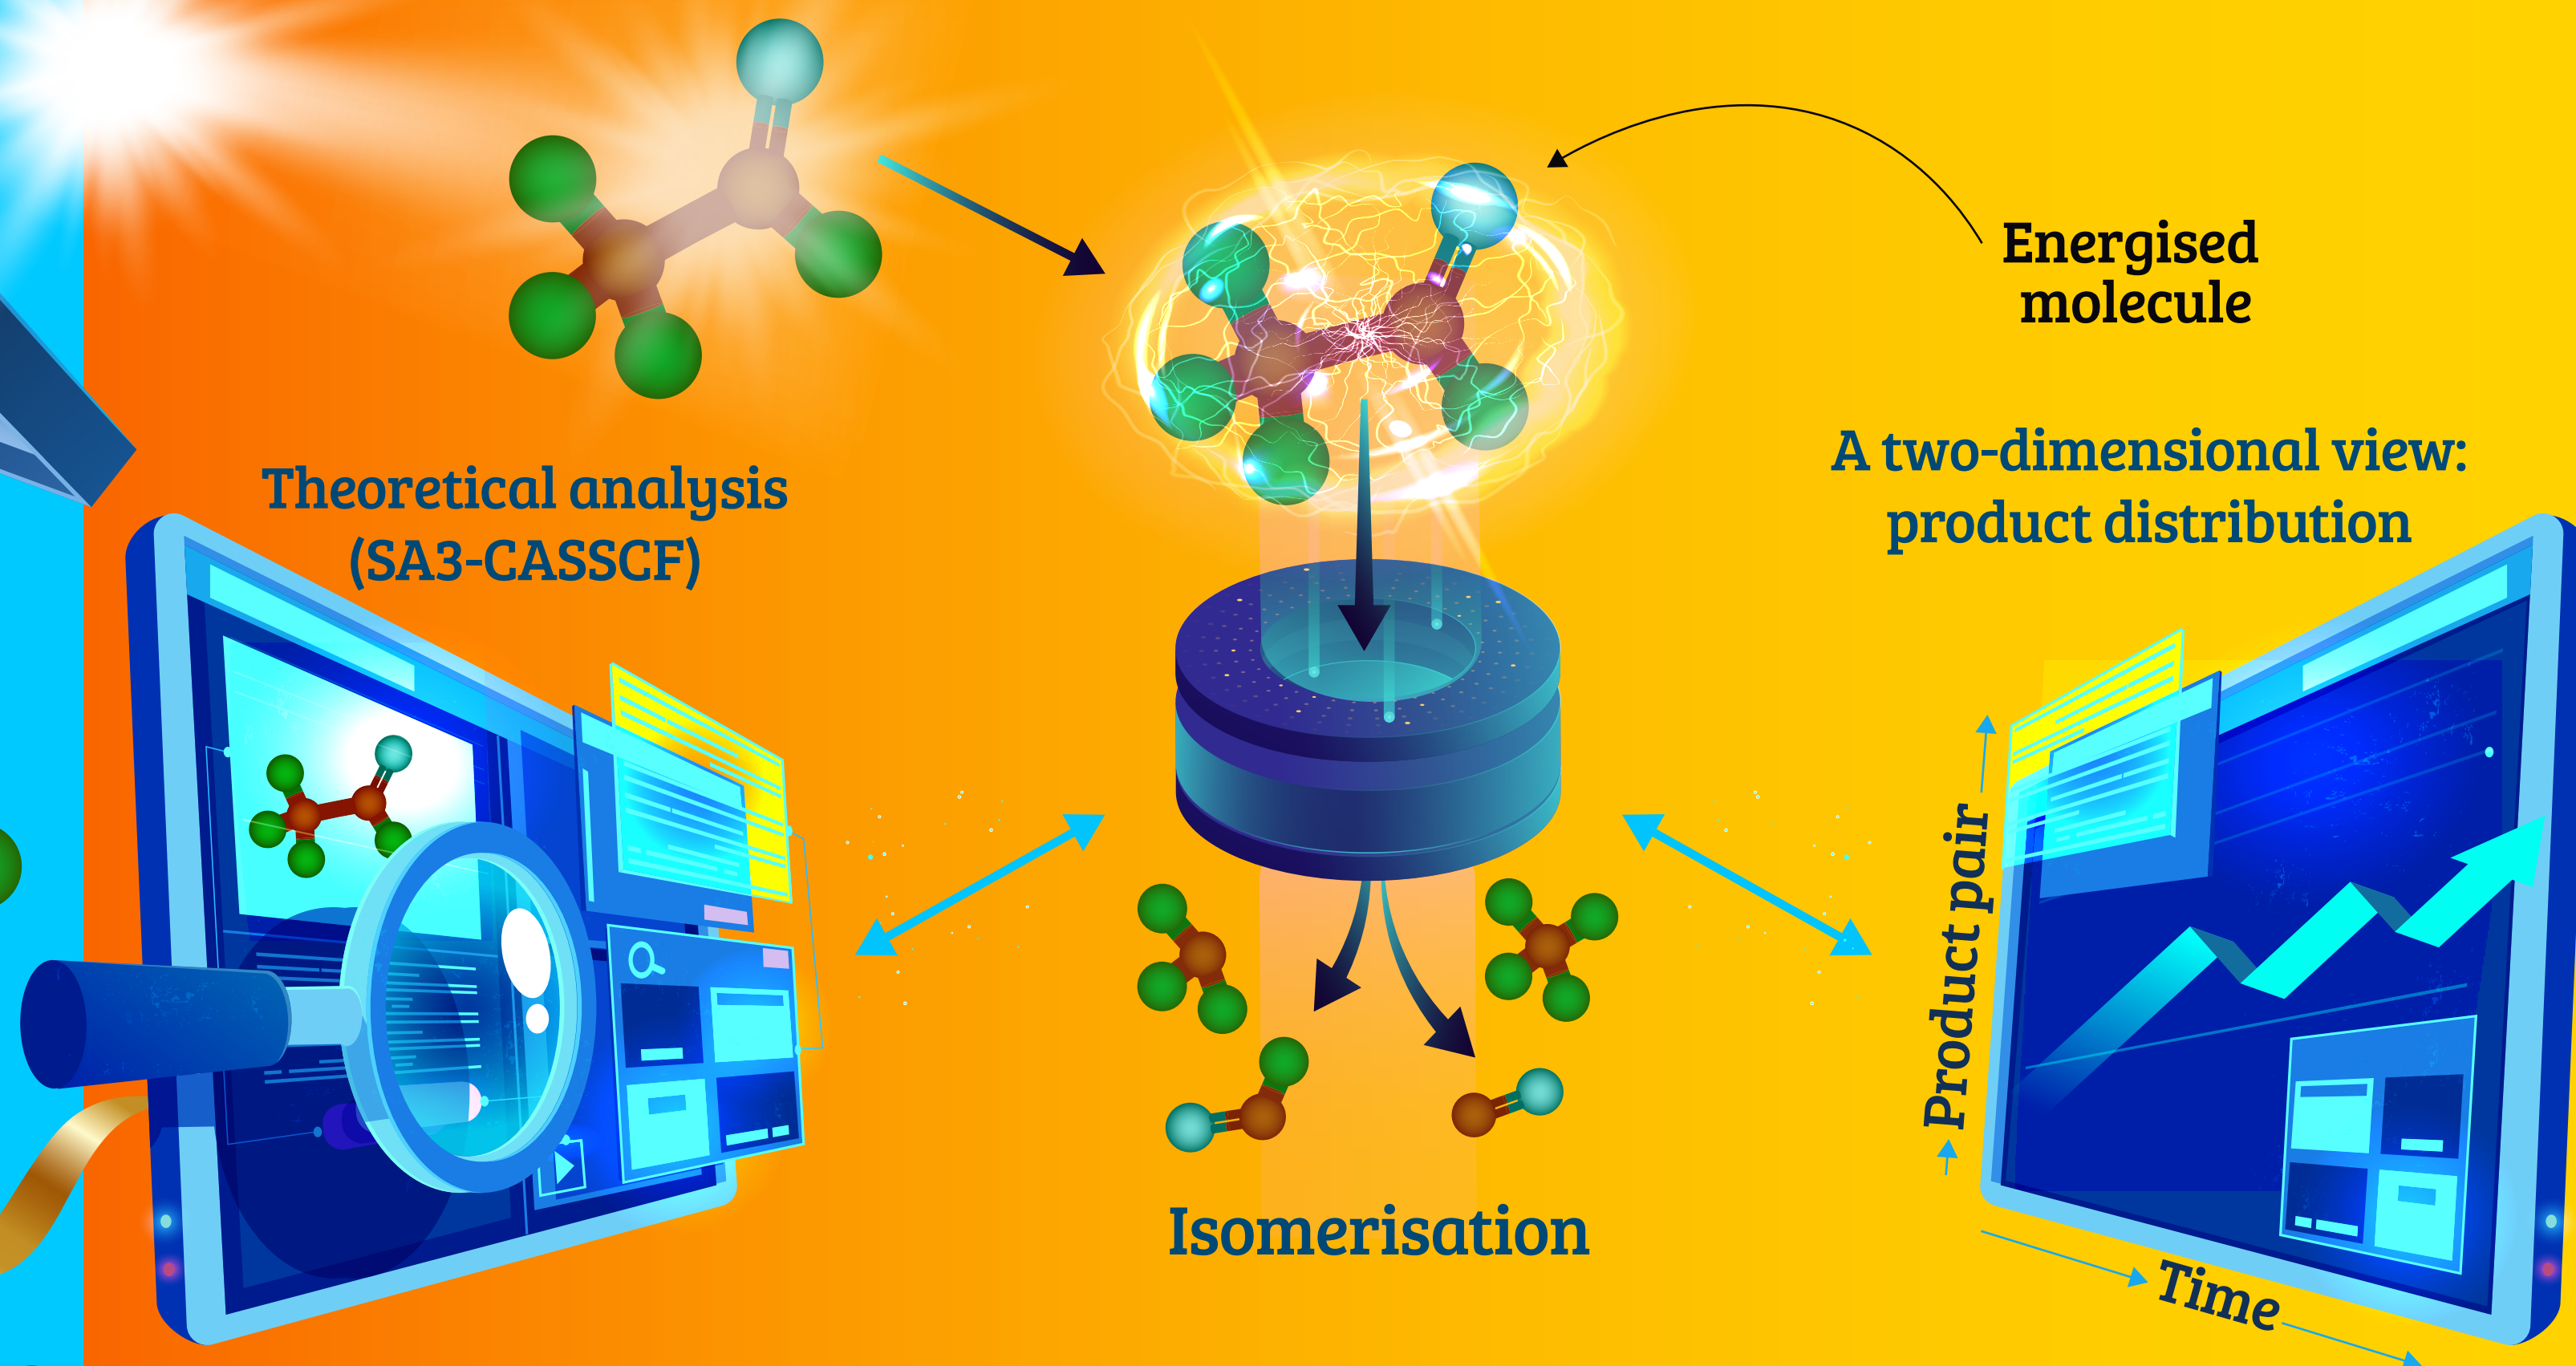

Isomerisation of energised molecules prior to dissociation might well be the rule rather than the exception in many polyatomic unimolecular processes
